# Supplementary material for: BARTweb: a web server for transcriptional regulator association analysis
Source: PubMed Central journal article supplement (PMC8034776; doi:10.1093/nargab/lqab022), 2021-04-09
Supplement: lqab022_supplemental_file.pdf [file lqab022_supplemental_file.pdf]

## Supplementary Data

### **BARTweb: a web server for transcriptional regulator association analysis**

**Supplementary Data includes 2 Supplementary Figures, 1 Supplementary Algorithm, Supplementary Methods, and 4 Supplementary Tables.**

**Supplementary Figure S1.** BARTweb improvements over BART1.1.

**Supplementary Figure S2.** BARTweb user input interface.

**Supplementary Algorithm 1.** Logistic adaptive lasso algorithm.

**Supplementary Methods.** Scripts and command lines used for running each tool.

**Supplementary Table S1.** Lists of TRs in human and mouse covered by BARTweb

**Supplementary Table S2.** Existing tools for TR prediction from input gene set

**Supplementary Table S3.** List of knockTF datasets used for benchmarking

**Supplementary Table S4.** Benchmarking results of each tool on TF prediction using knockTF data

## Supplementary Figure S1

**A**

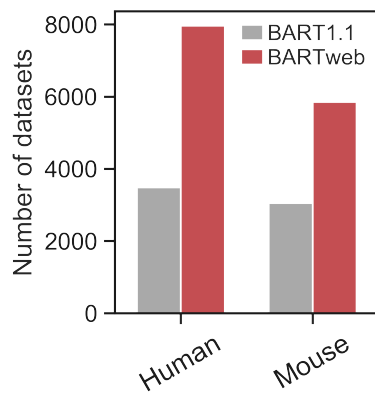

**B**

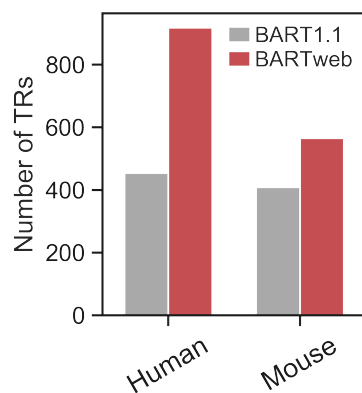

**Supplementary Figure S1. BARTweb improvements over BART1.1.** (A,B) Bar plots showing the number of collected ChIP-seq datasets (A) and the number of uniquely covered TRs (B) in BARTweb and BART1.1 data libraries.

## Supplementary Figure S2

The image shows a web interface for BART. At the top, there is a navigation bar with 'BART', 'Home', 'Result' (highlighted with a red box and an arrow pointing to it with the text 'Click to get your result'), 'Help', 'Contact', and 'Zanglab'. Below the navigation bar, the main heading is 'Run BART here' with links for 'Get result here' and 'Show me how to use'. The interface is divided into sections for 'Species', 'Input type', 'Input', and 'Job name'. The 'Species' section has radio buttons for 'Human (hg38)' (selected) and 'Mouse (mm10)'. The 'Input type' section has a dropdown menu set to 'Genelist' and a button 'Download hg38 gene list sample' (with an arrow pointing to it and the text 'Download the sample files'). The 'Input' section has two options: 'Upload' (selected) with a 'Choose File' button and 'No file chosen' text, and 'Paste' (unselected) with a text area containing the instruction 'You could either choose to upload a file or paste your inputs here.' Below the 'Input' section, there are input fields for 'Job name: (Optional)' (containing 'job1') and 'E-mail: (Optional)' (containing 'name@domain.com'). At the bottom, there are two buttons: 'Submit' (highlighted with a red box and an arrow pointing to it with the text 'Click to submit your job') and 'Reset'.

**Required steps**

1. Choose the species;
2. Choose the data type;
3. Upload your data.

**Optional information**  
If you leave your email address, we will notify you with the job status and the job key.

**Click to get your result**

**Download the sample files**

**Click to submit your job**

**Supplementary Figure S2. BARTweb user input interface.** Instructions on how to submit a job are illustrated.

## Supplementary Algorithm 1

### Algorithm 1: Logistic adaptive lasso

Input:  $\mathbf{y}, \mathbf{P}$

Initialize:  $\mathbf{w} = \mathbf{1}$

**repeat**

$$\mathbf{P}^* = \mathbf{P}/\mathbf{w}$$

$$\hat{\boldsymbol{\beta}} = \arg \min_{\boldsymbol{\beta}} \sum_{i=1}^n (-y_i (\mathbf{p}_i^{*T} \boldsymbol{\beta}) + \log(1 + e^{\mathbf{p}_i^{*T} \boldsymbol{\beta}})) + \lambda \sum_{j=1}^m |\beta_j|$$

$$\hat{\boldsymbol{\beta}}^* = \hat{\boldsymbol{\beta}}/\mathbf{w}$$

$$\mathbf{w} = 1/2 \sqrt{|\hat{\boldsymbol{\beta}}^*|}$$

**until** converged;

## Supplementary Methods

### Scripts and command lines used for running each tool

#### **BART (version 2.0)**

```
/*shell script*/  
bart2 geneset -i ${geneset} -s hg38
```

#### **HOMER (version 4.11)**

```
/*shell script*/  
findMotifs.pl ${geneset} human ${output} -p 4
```

#### **Pscan (version 1.5)**

```
/*shell script*/  
fai_file=Homo_sapiens_1000up_0down.fasta.fai  
fasta_file=Homo_sapiens_1000up_0down.fasta  
matrix_file=Homo_sapiens_1000_0.short_matrix  
cat ${fai_file} |cut -f1 |sort -u > ${fai_file}.uniq  
convertIDs.pl ${geneset} human refseq > ${geneset}.refseq  
cat ${geneset}.refseq |awk '{print "hg38_refGene_"$0}' > ${geneset}.refseq.txt  
cat ${fai_file}.uniq ${geneset}.refseq.txt |sort|uniq -d > ${geneset}.refseq.txt.fai  
xargs samtools faidx ${fasta_file} < ${geneset}.refseq.txt.fai > ${geneset}.fa  
pscan -q ${geneset}.fa -m ${matrix_file}
```

#### **ChEA3 (version 3)**

```
/*R script*/  
library(httr)  
library(jsonlite)  
genes <-read.table(${geneset}),stringsAsFactors=FALSE)  
url = "https://amp.pharm.mssm.edu/chea3/api/enrich/"  
encode = "json"  
payload = list(query_name = "myQuery", gene_set = genes[,1])  
response = POST(url = url, body = payload, encode = encode)  
json = content(response, "text")  
results = fromJSON(json)  
write_json(results,file.path(outdir,paste(allfiles[i], ".json",sep="")))  
results_csv <- data.frame(TF = results$"Integrated--meanRank"$"TF", Score =  
results$"Integrated--meanRank"$"Score")  
write.csv(results_csv,file = ${output},row.names=TRUE)
```

#### **TFEA.ChIP (version 1.10)**

```
/*R script*/  
library(TFEA.ChIP)  
genes <-read.table((${geneset}),stringsAsFactors=FALSE)  
cont_genes <-contingency_matrix(genes[,1])  
results <- getCMstats(cont_genes)  
write.csv(results,file = ${output},row.names=TRUE)
```
